# Supplementary material for: A Pilot Project on a Community-Supported Approach to Blood Pressure Management to Improve Sustainability in a Rural Community in Bangladesh
Source: Research Square preprint supplement (doi:10.21203/rs.3.rs-5282728/v1), 2024-10-29
Supplement: Supplementary file 1 [file 2515982d02d934f9e66005b3.docx]

**Appendix 1**

**Ethnographic Research Questions**

**Guiding Questions:**

The guiding questions for ethnographic research are given below. The interviewer is expected to demonstrate reflexivity based on the interviewees' responses. Each question set attempted to gather information on the community variables identified in the subtitles below.

**Consent Statement:** We want to do a pilot project on hypertension management in your community to mitigate the risk of heart attack and stroke. We plan to do this by first understanding your community as you and the community's residents see it. Then, we would like to collaborate with leaders you trust to implement the project. The information will be used to understand and facilitate support from your community for hypertension patients. Selected residents in the community may receive treatment if screened positive. If you have any questions/concerns in this process, please let us know.

**1. Community Boundary and General Description:**

- What do you name this community? How did this name come about? Are there other narratives on the community’s origin?

- Up to which point do you think is the boundary of your community? Can you specify a landmark? Do other residents agree on the landmark?

- How would you describe the people who live in the community?

- Who in the community would you trust in times of need, particularly during health needs? Under what circumstances do you seek help and what kind of help do you receive?

- Who do you think holds a superior status in the community? Why do you think they have a superior status? Do they provide any support to the rest of the residents?

- Who do you think holds lesser status in the community? Why do you think they have an inferior status? What issues do they face? Are there individuals or groups who assist them?

- Who do you consider a leader in the community? Are they part of a group? If not, who is a leader, in your opinion? Do all residents trust the individual or group or are there disagreements?

**2. Institutions:**

- What do you think are the key institutions in the community? Examples include schools, hospitals, colleges, local mosques, etc.

- How do you and other residents participate in these institutions? For what purpose do you interact with these institutions?

- Who are the key people you trust/rely on in those institutions? What benefit do you receive from these key people or institutions? Under what circumstances?

- Describe a time when you had a positive experience with these institutions. Do other residents have similar experiences?

- Describe a time when you had a negative experience with these institutions. Do other residents have similar experiences?

**3. Shared history and identity:**

- What aspects of community identity and issues are important to the residents in the community? For example, it may be religious beliefs, concerns about education, political opinions, and health care.

- How do these important things/aspects influence behavior and interaction among community members?

- What events/festivals/occasions are important to the community? How do different people, based on socio-economic status, gender, and age, celebrate them? How do residents interact with one another during these events?

- Are there people and individuals who play key roles in organizing community-important events and activities?

- Are there people and individuals that you feel are left out in the events?

**4. Groups and Sub-groups:**

**-**  Please identify groups within your community. Examples include local hang-out groups, age or gender-based groups, and groups with social, political, and economic interests.

- Where do the groups interact? On what issues do they talk about?

- Do members of a group share resources with one another? If so, what resources do they share, and under what circumstances?

- Describe a time when groups had a conflict. What was the reason for the conflict? Were they able to resolve it? If so, who mediated?

- Are there any groups you consider awkward, need change among themselves, are disliked, or do not fit in with the rest? Please describe. How do you and other residents deal with them?

**5. Economy and Employment:**

-How do you earn a living to support yourself and your family? Please describe your daily work life.

- How do other residents earn a living?

- Does men and women differ in their work? If so, how?

- How is the relationship between you and your employer? Does your employer support your health needs? If so, what will be the amount?

- Describe a monthly budget for a resident in the community. How does it differ based on socioeconomic status?

- Do you share your earnings beyond your immediate family? If so, when?

- What assets/properties do the residents own, such as land, major farm, etc.? What proportion of the residents own these assets?

- What are the work locations? Do people migrate for work? If so, where and for how long?

**6. Gender and Family:**

- Please describe the family relationships within your household. What roles do different members perform based on gender and age?

- Who makes important decisions in the family? What decisions do women make? What roles do young adults, children, or older people play in your family?

- Who do you consider the principal earning member of the family? Describe the relationship between the principal earning member and the rest of the family.

- Where do your extended family members live? Do you receive support from them? If so, under what circumstances?

- How is a sick person taken care of in the family? What roles do different family members perform? Do extended family members assist?

**7. Health care needs and resources:**

**-** What are the health problems residents face in the community?

- Where do you go to meet your health care needs?

- Is there any person or institution you trust to meet your health care needs?

- Please describe your experience in a facility where you have received care.

- Have you received health care from a local traditional healer? When do you see them? Please describe your experience with them.

- Where do patients go during a medical emergency, such as a stroke or heart attack? Please discuss what you do, who you collaborate with, and what issues/problems you face during an emergency.

- Where do people buy medications? Are medicines affordable? How many days of medication supply can you afford?

- Do you or the residents substitute allopathic medicine with alternative, homeopathic, or herbal medicine? How does allopathic medicine compare with alternative medicine?

- Do residents consider medical center bills affordable? How does affordability vary based on socio-economic status, medication, laboratory, or imaging prescribed?

**8. Diet (including water):**

- Please describe your daily diet.

- From where do you buy your food?

- Which food products are accessible/cheap to you? Which are not?

- Are there groups in the community who can access food more easily than others?

- Who decides what food will be eaten in the family?

- Who decides the salt or oil level in the foods in the family? Who cooks for the family?

- How do people modify their food for ill people?

- How does diet change during important events like festivals or marriage?

- Do you have access to clean water, soap for washing hands, and fresh produce?

**9. Chronic diseases:**

- What is your and residents’ perception regarding silent but chronic diseases, such as hypertension and diabetes? For example, what symptoms do you attribute to hypertension and diabetes, what consequences, and is it important to take care of them?

- What is your or other residents' knowledge about how to take care of diabetes and hypertension?

-What measures do you and the residents take to treat chronic diseases? For example, do you change your diet or exercise, take medications regularly, or follow up with providers?

- Are there circumstances that cause residents to not take care of diabetes and hypertension?

- Where do you go to access care for chronic diseases? Please describe your experience.

- What issues do you or residents face accessing care for chronic diseases? Please describe.

**10. Non-profit Services:**

- What are the non-profits working in the area? What services do they provide?

- Are there any health-related non-profits in the area? What services do they provide? When do you or residents access them?

- What is your or the resident’s experience with them? Please discuss both positive and negative experiences.

- Are there individuals in the non-profits who the residents trust? What support do trust individuals provide?

- Are there individuals in the non-profits who the residents distrust? What issues have the residents faced with the distrusted individuals?

**12. Government:**

- What government services are available in the area? What services do they provide?

- Are there any health-related services in the area? What services do they provide? When do you or residents access them?

- What is your or the resident’s experience with them? Please discuss both positive and negative experiences.

- Are there individuals in the government services who the residents trust? What support do trust individuals provide?

- Are there individuals in the government services who the residents distrust? What issues have the residents faced with the distrusted individuals?

**Appendix 2**

Roles of health committee:

1. Be informed about patients with hypertension in the community and their support needs.

2. Oversee health worker (HW) activities and take a regular report from HW on patient progress and issues.

3. Support doctors in their interaction with patients.

4. Communicate with the research team about issues related to patient care.

5. Work with patients, patient-selected family members and neighbors, and HW to help meet patient treatment goals.

6. Ensure a timely and adequate supply of medications.

7. Facilitate group discussions and community forums to develop a shared understanding of the importance of hypertension control among residents and promote collaborative actions to meet health needs.

Roles of the Inclusion Committee:

1. Ensure that HW is accessible to all patients

2. Take steps to understand the issues of marginalized people within the community and their inclusion.

3. Resolve conflicts among family members, health committee members, and HWs involved in patient care.

4. Keep the health committee and HW accountable for their role.

5. Oversee the inclusion workers (IW) activities. They will visit each marginalized patient and report to the inclusion committee.

6. Facilitate group discussions and community forums to discuss health, well-being, and community cohesion, focusing on the inclusion of marginalized people. Address any outstanding needs or issues among residents.

Appendix 3

WRITTEN/ORAL CONSENT FOR SCREENING FOR HYPERTENSION

#### In an EMERGENCY, call the study coordinator 24 hours a day at +8801818972387

**Ethical Review Committee Chairperson: Dr. Md. Jawadul Huq, Rajshahi Medical College.**

**Principal Contacts:**

1. **Abdullah Noor, MD, Bangladesh Medical Association of North America-Louisiana Chapter, LA, USA. Phone# +15049191230**
2. **Md Jawadul Haque, Professor and Head of the Community Medicine Department, Rajshahi Medical College, Rajshahi, Bangladesh. Phone: +88017132228327**

**Researcher's Statement**

We are asking you to be part of a research study. The purpose of this consent form is to give you the information you will need to help you decide whether to be in the study or not. Please read the form carefully. You may ask questions about the purpose of the research, what we would ask you to do, the possible risks and benefits, your rights as a volunteer, and anything else about the research or this form that is unclear. When we have answered all your questions, you can decide if you want to be in the study or not. This process is called 'informed consent'. We will give you a copy of this form for your records unless you do not want one.

# **Purpose of the Study**

Hypertension is a major problem in Bangladesh. Many people die from complications of these diseases, such as stroke, heart attack, heart failure, and kidney failure. Furthermore, chronic diseases like these affect day-to-day activities. Treatment of these complications becomes very difficult once they arise. One of the important ways we can help is by controlling hypertension, which plays a major role in developing these problems.

Besides medication, patients need to manage many aspects of the disease, such as buying medication, taking medication on time, changing food habits, and exercising. We want to see if we can help patients achieve the goal by facilitating collaboration among trusted people and leaders. We also want to take blood pressure data regularly to share the data with providers so that they can make early interventions if necessary. Early intervention may keep the disease from getting worse. We hope this will help prevent complications or delay them.

The purpose of the study is to see how many people in your community are being affected by hypertension and whether regular monitoring, instituting early medication changes, or facilitating community support helps keep hypertension under control and make the project last long term.

**Procedure**

We plan to screen willing individuals greater than 30 years of age for hypertension. Blood pressure screening will be done using an electronic blood pressure monitor if you are screened positive. we plan to work with you to understand your disease better and provide hypertension care. We also aim to work with your family members and close neighbors to help facilitate collaborative action to meet your healthcare needs. Finally, we want to work with a trusted leader and data collector nominated or approved by you, who will regularly come into your home to check your chronic disease status to share the data with a licensed Bangladesh provider, who will be involved in your care. The data collectors will collect data using an electronic blood pressure monitor to check if blood pressure is out of control.

The intervention may include either medication change or facilitation of collaborative action among agreed-upon social supports. A provider may call you or a trusted leader may reach out to you for this purpose. Using the understanding, they will either tap into social support resources to meet your medical needs or recommend a change of medications. All people involved will sign a contract to ensure your information is kept confidential and not used to harm you.

After screening, if you are positive for hypertension, we will schedule a follow-up visit. During follow-up, you will be asked questions about your detailed medical history. There will be questions for your family about who plays a major role in food and living. There will be a discussion with your family about how to meet your medical needs best. Then, we will ask you about residents in your community who can help you to meet your needs and leaders who you trust to coordinate your care. Finally, we will discuss with your trusted social support, leaders, and family members to coordinate your care best. We will also work with you, your family members, your leader, and other selected patients to appoint a data collector who will regularly collect your blood pressure information to make it available to the provider. The provider will read the data regularly to institute early intervention.

We may keep the information we collect from you for up to 5 years. In the future, we may use the data for additional studies related to this study's aims. We will notify you if we decide to close or extend the study.

# **Risks, stress or discomforts**

The study may collect personal information from you that is embarrassing to talk about. We will train our data collector appropriately. Although we are required to sign contracts, there may be concerns about sharing your information with your trusted leader, data collector, and social support. If you have any problems with them, please let us know.

If you have any questions about the study or a study-related injury or side effect, please contact Abdullah Noor at +15049191230.

**Alternatives to taking part in this study**

You do not have to participate in this study if you do not wish to. Alternatives to study participation include continuing your usual care and treatment through this or any other clinic.

**Benefits**

This study may have some possible benefits for you. If we can intervene early to keep your hypertension under control, it can prevent serious complications such as heart attack, stroke, and chronic kidney disease. If the service benefits you, we hope to extend the care to other community members.

# **Other information**

Information about your diagnosis is confidential. All information will be electronically transcribed and put in a password-protected internet-based computer system. Paper copies will be placed at a safe location under lock and key. The key will only be available to researchers. Information about your diagnosis and your participation in the research will be available to you and to the study team but not to anyone outside of the study.

The records from this study may be reviewed by study staff and trusted representatives of:

- Khorigapara Community
- Rajshahi Medical College
- Bangladesh Medical Association of North America- Louisiana Chapter.

Although we will try to keep your information confidential, no system to protect your confidentiality can be completely secure. It is possible that unauthorized persons might discover you are in this study or obtain information about you. University and government offices sometimes review studies such as this one to ensure they are done safely and legally. If this study is reviewed, your records may be examined. The reviewers will protect your privacy. The study records will not be used to put you at legal risk or harm.

You may refuse to participate or withdraw from the study at any time without penalty or loss of benefit to which you are otherwise entitled.

Questions about the study should be addressed to the investigators: Dr. Abdullah Noor.

The printed name of study staff obtaining consent Signature Date

Subject's statement

This study has been explained to me. I volunteer to take part in this research. If necessary and I consider it appropriate, I also give permission to my family members or close associates to give information to me. I have had a chance to ask questions. If I have questions later about the research, I can ask one of the researchers listed above. If I have questions about my rights as a research subject, I can call the Ethical Review Committee at Rajshahi Medical College Hospital. I will receive a copy of this consent form.

Do you have any questions?

Do you agree to participate?

Yes…………..

No……………

If yes, sign below:

Printed name of subject Signature of subject Date

Thumbprint if no signature

____________________________________________________

Printed name of witness Signature of witness

Date______________________________

Copies to: 1. Investigators

2. Subject

3. Medical Record

Appendix 4

Checklist to Measure Blood Pressure

| **A. BP measurement Preparation**: | | | | | |
| --- | --- | --- | --- | --- | --- |
| a. Did the participant smoke in the past 30 minutes? | | |  | 1. Yes |  2. No |
| b. Did the participant have any caffeinated drink (e.g. coffee, tea) in the past 30 minutes? | | |  | 1. Yes |  2. No |
| c. Has the participant rested for at least 5 minutes before blood pressure measurement? | | |  | 1. Yes |  2. No |
| d. Is the person sitting correctly on a chair with legs uncrossed? | | |  | 1. Yes |  2. No |
| f. Does the measurement arm have any evidence of illness, such as swelling, redness, pain, etc? | | |  | 1. Yes |  2. No |
| g. Is the person sitting still? | | |  | 1. Yes |  2. No |
| h. Is the blood pressure equipment properly set up? | | |  | 1. Yes |  2. No |
| ***Ensure 1st and 2nd readings are taken at least 3 minutes apart.*** | | | | | |
| **BP Readings** | **1st Reading** | **2nd Reading** | | | |
| Time of BP Reading (hh:mm): |  |  | | | |
| Systolic BP (SBP) (mm Hg): |  |  | | | |
| Diastolic BP (DBP) (mm Hg): |  |  | | | |
| PULSE/min: |  |  | | | |
|  | | | | | |

Appendix 5

**Hypertension Algorithm for Khorigapara Community, Rajshahi, Bangladesh**

1. Obtain Basic Metabolic Panel

2. Initiate ARB (dose titration)

BP not controlled.

Initiate Carvedilol (dose titration)

BP not controlled.

Initiate following:

1. non-pharmacological measures.

2. Amlodipine (dose titration).

3. Statin if high CV risk.

Initiate following:

1. non-pharmacological measures.

2. Amlodipine (dose titration).

3. Statin if high CV risk.

Yes

No

Able to afford labs?

Urgent specialist referral if having emergences symptoms including chest pain, shortness of breath, systemic disease.

Newly diagnosed or previously diagnosed hypertension (BP >140/90)

High CV risk:

1. Age >55 and SBP >160

2. Diabetes (identified by fasting glucose screen, or random glucose check or documented history).

3. History of cardiovascular disease

4. Current Smoker

Statin: Rosuvastatin 20
